# Supplementary material for: Biophysical Constraints on Optimal Patch Lengths for Settlement of a Reef-Building Bivalve
Source: PubMed Central journal article supplement (PMC3747277; doi:10.1371/journal.pone.0071506), 2013-08-19
Supplement: pone.0071506.s003.pdf [file pone.0071506.s003.pdf]

Table S1: Parameters used in behavior model.

| Behavior | $\hat{a}_0$ (cm s <sup>-1</sup> ) | $\hat{a}_1$ (cm s <sup>-1</sup> ) | $\hat{a}_2$ | $\hat{a}_3$ |
|----------|-----------------------------------|-----------------------------------|-------------|-------------|
| $w_d$    | 0.023                             | -3.66                             | 10.8        | 1.05        |
| $w_p$    | 0.023                             | -0.61                             | 10.8        | 1.05        |
| $w_n$    | 0                                 | 0                                 | 0           | 0           |

Parameter sets  $\hat{a}_i$  were used in Eq. 1 to model settlement of larvae with three different behaviors:  $w_d$  active diving in turbulence [20],  $w_p$  passive sinking in turbulence, and  $w_n$  neutral buoyancy.
