# Supplementary material for: Biophysical Constraints on Optimal Patch Lengths for Settlement of a Reef-Building Bivalve
Source: PubMed Central journal article supplement (PMC3747277; doi:10.1371/journal.pone.0071506), 2013-08-19
Supplement: pone.0071506.s004.pdf [file pone.0071506.s004.pdf]

Table S2: Characteristics of four substrate types.

| Substrate    | $\bar{z}_o$ (cm) | $C_D$ | $s_{u_s}$ |
|--------------|------------------|-------|-----------|
| Natural reef | 1.5              | 0.019 | 0.114     |
| Oyster shell | 0.3              | 0.008 | 0.075     |
| Whelk shell  | 1.7              | 0.011 | 0.119     |
| Mud          | 0.4              | 0.009 | 0.082     |

Average roughness height  $\bar{z}_o$ , drag coefficient  $C_D$ , and shear velocity scale factor  $s_{u_s}$  for velocity profiles used in the hitting-distance model. Measurements described in [12].
